# Supplementary material for: Fungal Metabolite Asperaculane B Inhibits Malaria Infection and Transmission
Source: PubMed Central journal article supplement (PMC7412362; doi:10.3390/molecules25133018), 2020-07-01
Supplement: molecules-25-03018-s001.pdf [file molecules-25-03018-s001.pdf]

# Fungal Metabolite Asperaculane B Inhibits Malaria Infection and Transmission

Guodong Niu <sup>1</sup>, Yue Hao <sup>2</sup>, Xiaohong Wang <sup>3</sup>, Jin-Ming Gao <sup>4</sup> and Jun Li <sup>5,\*</sup>

<sup>1</sup> Department of Biological Sciences, Biomolecular Sciences Institute, Florida International University, Miami, Florida, USA; gniu@fiu.edu

<sup>2</sup> College of Public Health, South China University, Hengyang, Hunan, China; 934709203@qq.com

<sup>3</sup> Department of Biological Sciences, Biomolecular Sciences Institute, Florida International University, Miami, Florida, USA; xiawang@fiu.edu

<sup>4</sup> Shaanxi Key Laboratory of Natural Products Chemical Biology, College of Science, Northwest A&F University, Yangling, Shaanxi, China; jinminggao@nwfau.edu.cn

<sup>5</sup> Department of Biological Sciences, Biomolecular Sciences Institute, Florida International University, Miami, Florida, USA; lij@fiu.edu

\* Correspondence: lij@fiu.edu, Tel.: 305-348-7618;

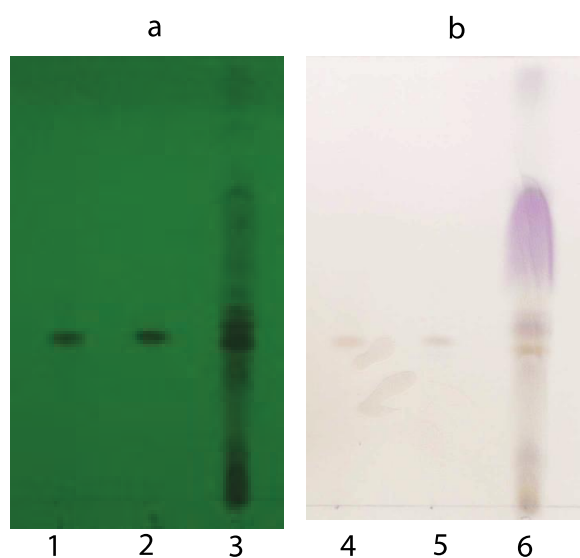

**Figure 1.** Determination of purity of asperaculane B.

Samples were analyzed on thin layer column chromatography (TLC) with solvents of methanol and dichloromethane in the ratio of 1:10 (v/v). The TLC plate was visualized under UV light of 254 nm (a) and then the TLC plate was developed with a spray reagent (vanillin-ethanol- sulphuric acid, 1 g : 95 mL : 5 mL) followed by heating for 5-10 minutes at 110° C (b). Lanes: 1, 4: The isolated active compound “C1”; 2,5: the reference compound of asperaculane B; and 3,6: the crude extract.
